# Supplementary material for: Depression profile in malignancy patients attending otorhinolaryngology clinic
Source: Springer Nature journal article supplement (doi:10.1007/s00405-020-06289-w), 2020-08-17
Supplement: MOESM1 [file 18287964]

**PHQ-9 Questionnaire**

**Over the last 2 weeks, how often have you been bothered by any of the following problems?**

*(Use “✓” to indicate your answer)*

|                                                                                                                                                                             | Not at all | Several days | More than half the days | Nearly everyday |
|-----------------------------------------------------------------------------------------------------------------------------------------------------------------------------|------------|--------------|-------------------------|-----------------|
| 1. Little interest or pleasure in doing things                                                                                                                              | 0          | 1            | 2                       | 3               |
| 2. Feeling down, depressed, or hopeless                                                                                                                                     | 0          | 1            | 2                       | 3               |
| 3. Trouble falling or staying asleep, or sleeping too much                                                                                                                  | 0          | 1            | 2                       | 3               |
| 4. Feeling tired or having little energy                                                                                                                                    | 0          | 1            | 2                       | 3               |
| 5. Poor appetite or overeating                                                                                                                                              | 0          | 1            | 2                       | 3               |
| 6. Feeling bad about yourself — or that you are a failure or have let yourself or your family down                                                                          | 0          | 1            | 2                       | 3               |
| 7. Trouble concentrating on things, such as reading the newspaper or watching television                                                                                    | 0          | 1            | 2                       | 3               |
| 8. Moving or speaking so slowly that other people could have noticed? Or the opposite — being so fidgety or restless that you have been moving around a lot more than usual | 0          | 1            | 2                       | 3               |
| 9. Thoughts that you would be better off dead or of hurting yourself in some way                                                                                            | 0          | 1            | 2                       | 3               |

**FOR OFFICE CODING:** Total score = 0 + \_\_\_\_\_ + \_\_\_\_\_ + \_\_\_\_\_ =

If you checked off any problems, how difficult have these problems made it for you to do your work, take care of things at home, or get along with other people?

|                          |                          |                          |                          |
|--------------------------|--------------------------|--------------------------|--------------------------|
| Not difficult at all     | Somewhat difficult       | Very difficult           | Extremely difficult      |
| <input type="checkbox"/> | <input type="checkbox"/> | <input type="checkbox"/> | <input type="checkbox"/> |

From the Primary Care Evaluation of Mental Disorders Patient Health Questionnaire (PRIME-MD PHQ), developed by Drs. Robert L. Spitzer, Janet BW Williams, Kurt Kroenke, and colleagues. PRIME-MD is a trademark of Pfizer Inc. Copyright 1999 Pfizer Inc. May be photocopied *ad libitum*.
